# Supplementary material for: Pictorial Assessment of Health-Related Quality of Life. Development and Pre-Test of the PictoQOL Questionnaire
Source: Int J Environ Res Public Health. 2022 Jan 31;19(3):1620. doi: 10.3390/ijerph19031620 (PMC8835013; doi:10.3390/ijerph19031620)
Supplement: Supplementary file 1 [file ijerph-19-01620-s001.zip › ijerph-1547262-supplementary.pdf]

**Supplementary material for “Pictorial assessment of health-related quality of life. Development and pre-test of the PictoQOL questionnaire” (Brzoska et al.)**

**Table S1.** Socio-demographic characteristics of the interviewees participating in focus group discussions; PictoQOL development study.

| ID             |   | Age<br>(years) | Sex    | Highest educational<br>degree* | Occupation**                     | Country of birth     |
|----------------|---|----------------|--------|--------------------------------|----------------------------------|----------------------|
| <b>Round 1</b> |   |                |        |                                |                                  |                      |
| FG 1           | 1 | 29             | Female | Bachelor                       | University student               | Syria                |
|                | 2 | No response    | Female | No response                    | No response                      | No response          |
|                | 3 | No response    | Female | No response                    | No response                      | No response          |
| FG 2           | 1 | 42             | Male   | Doctoral                       | Professional                     | Turkey               |
|                | 2 | 24             | Female | Upper secondary                | University student               | Marokko              |
|                | 3 | 27             | Male   | Upper secondary                | University student               | Germany              |
| FG 3           | 1 | 26             | Male   | Upper secondary                | Professional                     | United Arab Emirates |
|                | 2 | 30             | Female | Bachelor                       | University student               | Syria                |
| <b>Round 2</b> |   |                |        |                                |                                  |                      |
| FG 4           | 1 | 28             | Female | Upper secondary                | University student               | Syria                |
|                | 2 | 24             | Female | Upper secondary                | University student               | Tunesia              |
|                | 3 | 23             | Male   | Lower secondary                | Service and sales workers        | Jordan               |
| FG 5           | 1 | 52             | Male   | Lower secondary                | Craft and related trades workers | Turkey               |
|                | 2 | 48             | Male   | Lower secondary                | Associate professionals          | Turkey               |
|                | 3 | 44             | Female | Upper secondary                | Housekeeper                      | Turkey               |
|                | 4 | 50             | Female | Primary school                 | Housekeeper                      | Turkey               |
| FG 6           | 1 | 25             | Male   | Bachelor                       | University student               | Germany              |
|                | 2 | 24             | Male   | Bachelor                       | University student               | Kuwait               |

\* Categorized according to the International standard classification of education 2011 [66] \*\* Categorized according to the International Standard Classification of Occupations [67].

**Table S2.** Socio-demographic characteristics of the interviewees participating in cognitive interviews; PictoQOL development study.

| <b>ID</b> | <b>Age (years)</b> | <b>Sex</b> | <b>Highest educational degree*</b> | <b>Occupation**</b>                    | <b>Country of birth</b>   |
|-----------|--------------------|------------|------------------------------------|----------------------------------------|---------------------------|
| D-01      | 61                 | Female     | Lower secondary                    | Service and sales worker               | Germany                   |
| D-02      | 27                 | Male       | Lower secondary                    | Service and sales worker               | Germany                   |
| D-03      | 31                 | Male       | Master                             | Professional                           | Germany                   |
| D-04      | 42                 | Female     | Upper secondary                    | Associate professionals                | Germany                   |
| D-05      | 63                 | Female     | Lower secondary                    | None                                   | Germany                   |
| D-06      | 38                 | Male       | Upper secondary                    | Technicians and associate professional | Germany                   |
| D-07      | 33                 | Female     | Master of Science                  | Professional                           | Germany                   |
| D-08      | 25                 | Male       | Upper secondary                    | Professional                           | Germany                   |
| D-09      | 54                 | Female     | Upper secondary                    | Service and sales worker               | Germany                   |
| D-10      | 23                 | Female     | Upper secondary                    | Service and sales worker               | Germany                   |
| T-01      | 32                 | Male       | Master                             | Professional                           | Turkey                    |
| T-02      | 19                 | Female     | Upper secondary                    | School student                         | Germany (Parents: Turkey) |
| T-03      | 61                 | Female     | Master                             | Pensioner                              | Turkey                    |
| T-04      | 48                 | Female     | Primary                            | Service and sales worker               | Turkey                    |
| T-05      | 61                 | Male       | Bachelor                           | Skilled agricultural                   | Turkey                    |
| T-06      | 59                 | Male       | Upper secondary                    | Craft and related trades worker        | Turkey                    |
| T-07      | 61                 | Female     | Lower secondary                    | Housekeeper                            | Turkey                    |
| T-08      | 27                 | Male       | Upper secondary                    | Service and sales worker               | Germany (Parents: Turkey) |
| T-09      | 38                 | Male       | Upper secondary                    | Service and sales worker               | Germany (Parents: Turkey) |
| T-10      | 61                 | Male       | Upper secondary                    | Craft and related trades worker        | Turkey                    |
| T-11      | 62                 | Female     | Primary                            | Housekeeper                            | Turkey                    |
| T-12      | 38                 | Female     | Master                             | Professional                           | Turkey                    |
| S-01      | 30                 | Female     | Upper secondary                    | No response                            | Syria                     |
| S-02      | 28                 | Male       | Upper secondary                    | Elementary occupation                  | Syria                     |
| S-03      | 28                 | Male       | Bachelor                           | University student                     | Syria                     |
| S-04      | 25                 | Female     | Upper secondary                    | University student                     | Syria                     |
| S-05      | 42                 | Female     | Master                             | Professional                           | Syria                     |

|      |    |        |                    |                          |       |
|------|----|--------|--------------------|--------------------------|-------|
| S-06 | 27 | Male   | Bachelor           | Service and sales worker | Syria |
| S-07 | 35 | Female | Bachelor           | Service and sales worker | Syria |
| S-08 | 30 | Male   | Primary            | Housekeeper              | Syria |
| S-09 | 63 | Female | Bachelor           | Pensioner                | Syria |
| S-10 | 60 | Male   | <i>No response</i> | Pensioner                | Syria |
| S-11 | 30 | Male   | Bachelor           | University student       | Syria |
| S-12 | 35 | Female | Bachelor           | Professional             | Syria |
| S-13 | 31 | Male   | Primary            | Housekeeper              | Syria |
| S-14 | 45 | Female | Bachelor           | Service and sales worker | Syria |
| S-15 | 27 | Male   | Upper secondary    | Service and sales worker | Syria |

\* Categorized according to the International standard classification of education 2011 [66] \*\* Categorized according to the International Standard Classification of Occupations [67].

**Table S3.** Socio-demographic characteristics of the respondents in the pretest; PictoQOL development study.

| <b>ID</b> | <b>Age (years)</b> | <b>Sex</b> | <b>Highest educational degree*</b> | <b>Occupation**</b>              | <b>Country of birth</b> |
|-----------|--------------------|------------|------------------------------------|----------------------------------|-------------------------|
| QT-1      | 20                 | Male       | Bachelor                           | University student               | Germany                 |
| QT-2      | 27                 | Male       | Upper secondary                    | No response                      | Russia                  |
| QT-3      | 45                 | Female     | Bachelor                           | Professional                     | USA                     |
| QT-4      | 40                 | Female     | Lower secondary                    | Service and sales worker         | Russia                  |
| QT-5      | 21                 | Female     | Upper secondary                    | No response                      | Germany                 |
| QT-6      | 26                 | Female     | Bachelor                           | University student               | Germany                 |
| QT-7      | 25                 | Male       | Lower secondary                    | Service and sales worker         | Turkey                  |
| QT-8      | 22                 | Male       | Upper secondary                    | Manager                          | Germany                 |
| QT-9      | 21                 | Female     | Fachoberschulreife                 | Professional                     | Germany                 |
| QT-10     | 24                 | Female     | Bachelor                           | Manager                          | Afghanistan             |
| QT-11     | 27                 | Female     | Master                             | University student/ Professional | Morocco                 |
| QT-12     | 28                 | Male       | Master                             | Service and sales worker         | Morocco                 |
| QT-13     | 51                 | Male       | Master                             | Professional                     | Syria                   |
| QT-14     | 46                 | Female     | Master                             | Professional                     | Syria                   |
| QT-15     | 31                 | Male       | Bachelor                           | University student               | Syria                   |

\* Categorized according to the International Standard Classification of Education 2011 [66] \*\* Categorized according to the International Standard Classification of Occupations [67].
